# Supplementary material for: Altered Expression ofEPOMight Underlie Hepatic Hemangiomas inLRRK2Knockout Mice
Source: Hindawi journal article supplement (doi:10.1155/2016/7681259), 2016-01-01
Supplement: f1 [file 7681259.f1.pdf]

**Supplementary Figure S1. HIF-2 $\alpha$  expression in the livers of mice at the ages of 2, 12 and 18-19 months**

No visible HIF-2 $\alpha$  signals can be detected in the livers of wildtype or *LRRK2*<sup>-/-</sup> mice at these ages. Scale bars: 50  $\mu$ m.

**Supplementary Figure S2. HIF-2 $\alpha$  expression in the kidneys of mice at the ages of 2, 12 18-19 and 22-23 months**

(A) Non-specific HIF-2 $\alpha$  signals can be detected in the kidneys of 22-23 months old *LRRK2*<sup>-/-</sup> mice. (B) No apparent HIF-2 $\alpha$  signals can be detected in the kidneys of wildtype or *LRRK2*<sup>-/-</sup> mice at the ages of 2, 12 and 18 months. Scale bars: 50  $\mu$ m.

**Figure S1**

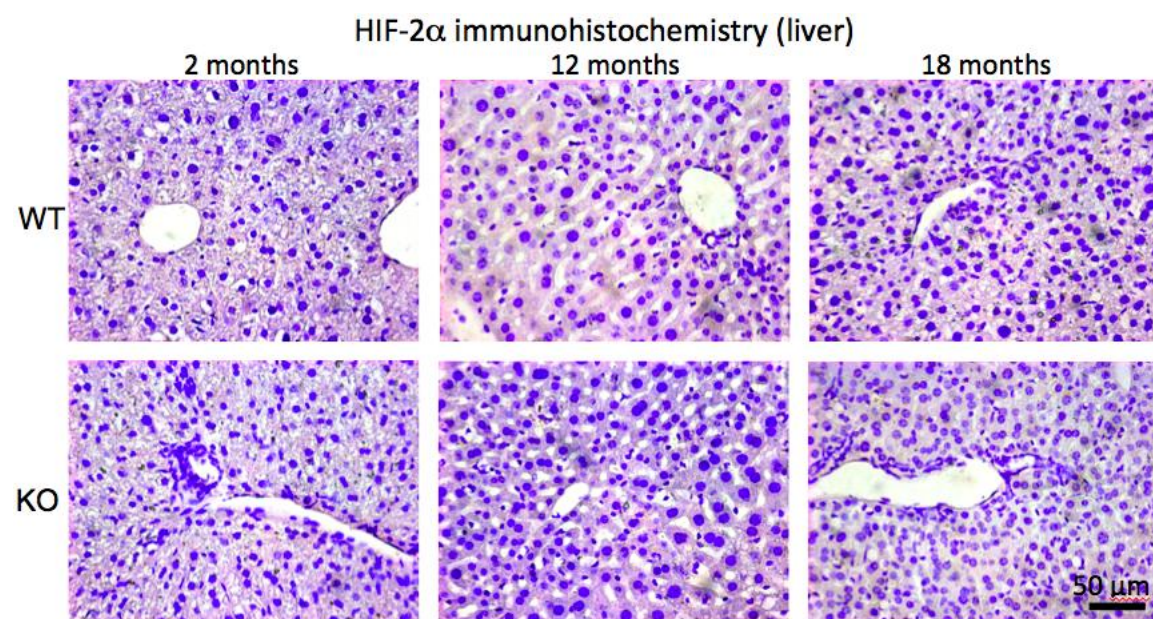

Figure S2

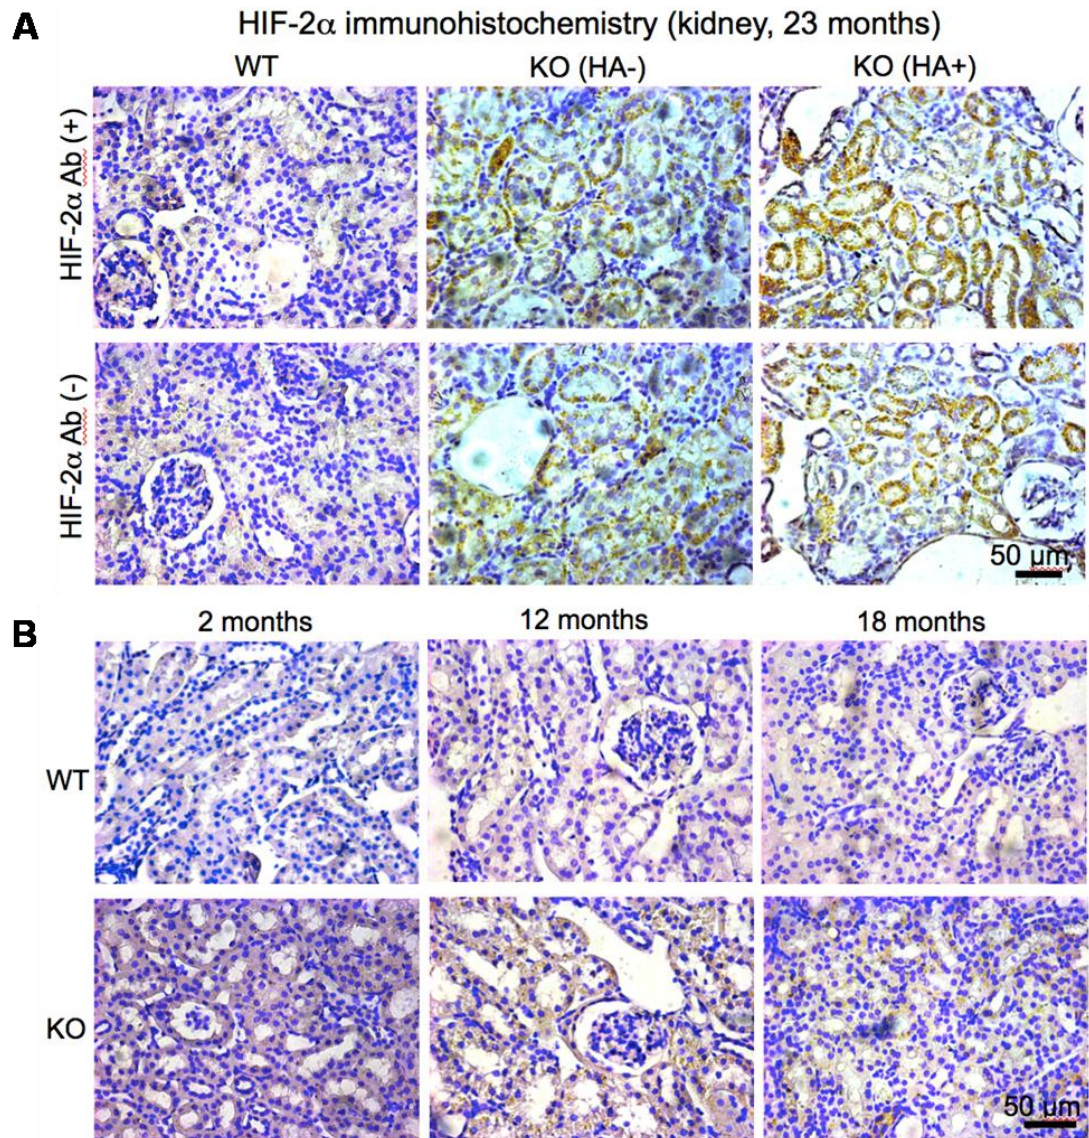

**Supplementary Table S1. Relative *EPO* levels in the kidneys of 23-month mice**

**(*GAPDH* as control)**

|          |           |           |           |           |          |          |
|----------|-----------|-----------|-----------|-----------|----------|----------|
| WT       | 0.3746612 | 0.6450844 | 0.7177532 | 0.9643506 | 1.277065 | 2.021026 |
| KO (HA-) | 0.1968609 | 0.5855199 | 1.017661  | 1.608839  | 2.362331 | 2.664026 |
| KO (HA+) | 0.7156684 | 1.817315  | 3.06013   | 3.466659  | 21.90904 | 79.12023 |

**Supplementary Table S2. List of qPCR primers.**

| Gene         | Position |         | Primer sequences      |
|--------------|----------|---------|-----------------------|
| <i>GAPDH</i> | exon 4-5 | Forward | AAC TTTGGCATTGTGGAAGG |
|              |          | Reverse | GGATGCAGGGATGATGTTCTG |
| <i>EPO</i>   | exon 3-4 | Forward | AGTCAACTTCTATGCTTGGA  |
|              |          | Reverse | CAGGATGGCTTCTGAGAG    |
| <i>VEGF</i>  | exon 2-3 | Forward | ACGACAGAAGGAGAGCAGAAG |
|              |          | Reverse | TCTCAATCGGACGGCAGTAG  |
| <i>LRRK2</i> | exon 1-2 | Forward | GGAGGCTCTGAAGAAGTTG   |
|              |          | Reverse | TACACTGGCAACTCTCATG   |
